# Supplementary material for: Transplantation of Mature Photoreceptors in Rodents With Retinal Degeneration
Source: PubMed Central journal article supplement — Transl Vis Sci Technol. 2019 May 30;8(3):30. doi: 10.1167/tvst.8.3.30 (PMC6543858; doi:10.1167/tvst.8.3.30), 2019-05-30
Supplement: tvst-08-03-14_s05.pdf [file tvst-08-03-14_s05.pdf]

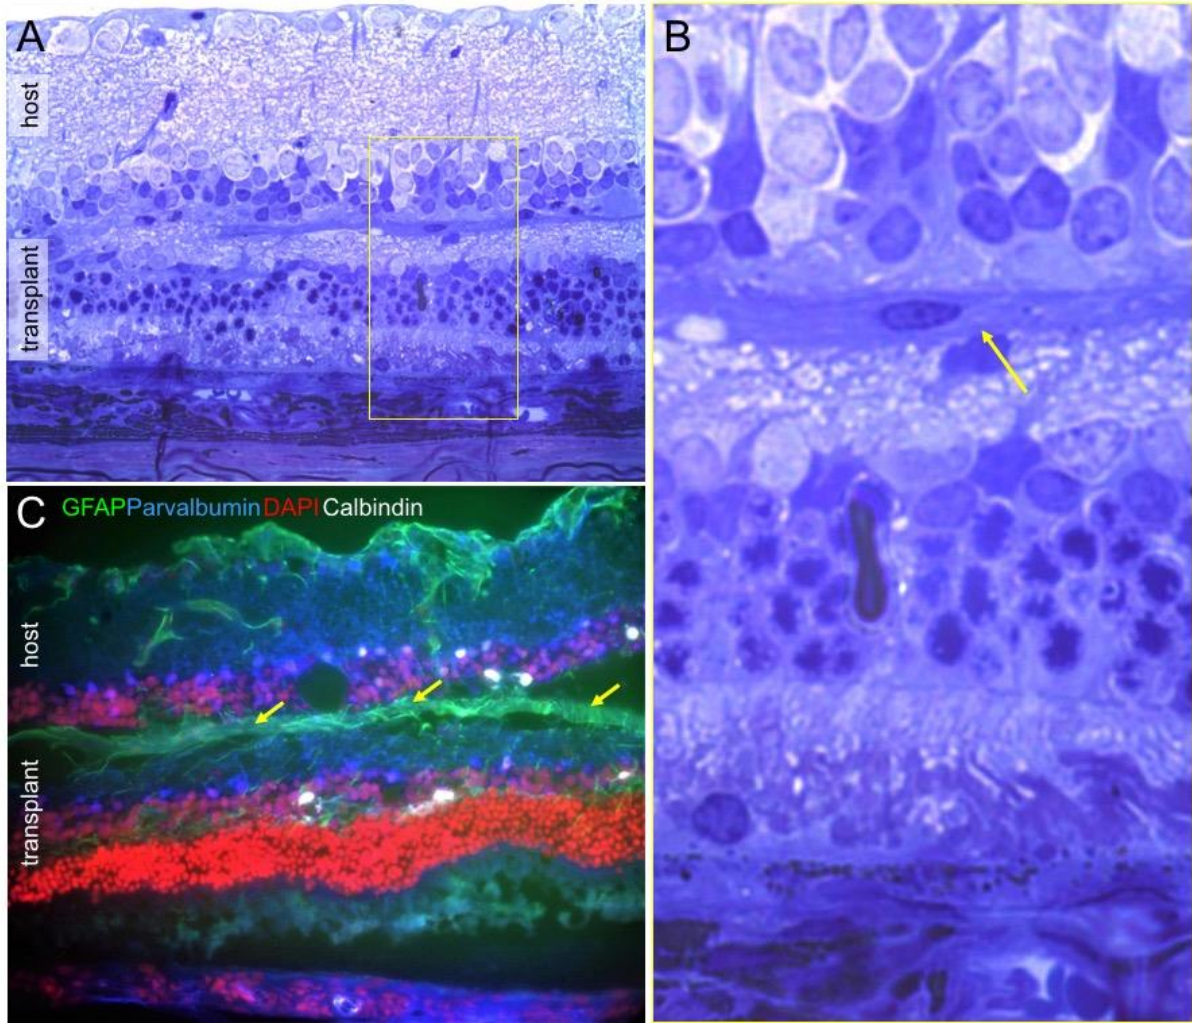

**Suppl. Fig. 3**

Presence of an insulating layer at the center of some transplants. A-B) Histological section of a transplanted retina (RCS transplanted for 6 weeks from a Long Evans donor) showing a seal layer between the transplant and the host at its center. Some fibrotic cells seem to contribute to formation of this layer (yellow arrow). C) Thick insulating layer (yellow arrows) in the center of the transplant (from a Long Evans into S334ter-3, 61 days post-surgery) exhibits GFAP (green). Other retinal layers in this frozen section are shown with Parvalbumin (blue), DAPI (red) and Calbindin (white) staining.
