# Supplementary material for: Transplantation of Mature Photoreceptors in Rodents With Retinal Degeneration
Source: PubMed Central journal article supplement — Transl Vis Sci Technol. 2019 May 30;8(3):30. doi: 10.1167/tvst.8.3.30 (PMC6543858; doi:10.1167/tvst.8.3.30), 2019-05-30
Supplement: tvst-08-03-14_s06.pdf [file tvst-08-03-14_s06.pdf]

**Suppl. video 1**

Transplantation procedure.
